# Supplementary material
Source: MDPI journal article supplement (https://www.mdpi.com/1999-4907/9/2/91)
Supplement: s1 [file s1]

Article

Drought impact on phenology and green biomass production of alpine mountain forest – case study of South Tyrol 2001-2012 inspected with MODIS time series

Supplementary Materials:

­­Table S1 Number of forest pixels that underwent linear interpolation within the 2001-2013 MODIS derived NDVI time series. Complete forest mask comprises 52394 pixels.

| compo- site | **year** | | | | | | | | | | | | |
| --- | --- | --- | --- | --- | --- | --- | --- | --- | --- | --- | --- | --- | --- |
| 2001 | 2002 | 2003 | 2004 | 2005 | 2006 | 2007 | 2008 | 2009 | 2010 | 2011 | 2012 | 2013 |
| 1 | 6141 | 253 | 6137 | 18804 | 4389 | 6749 | 706 | 4263 | 8107 | 17031 | 3306 | 6067 | 1407 |
| 2 | 12602 | 547 | 3865 | 11249 | 3691 | 4095 | 9028 | 5683 | 18336 | 8245 | 1129 | 5522 | 11671 |
| 3 | 3275 | 429 | 1729 | 2259 | 2342 | 14171 | 1994 | 1230 | 16827 | 8130 | 461 | 8526 | 11023 |
| 4 | 2084 | 5654 | 372 | 10696 | 3750 | 7019 | 533 | 347 | 9445 | 7386 | 1259 | 1388 | 3682 |
| 5 | 1818 | 114 | 57 | 3503 | 245 | 2132 | 278 | 481 | 3172 | 2837 | 289 | 252 | 4141 |
| 6 | 1385 | 46 | 72 | 462 | 12 | 1329 | 776 | 1445 | 2021 | 1370 | 157 | 32 | 2676 |
| 7 | 2599 | 1474 | 173 | 510 | 166 | 819 | 40 | 11651 | 309 | 635 | 12 | 665 | 458 |
| 8 | 2675 | 51 | 27 | 200 | 95 | 193 | 30 | 326 | 154 | 374 | 1 | 697 | 44 |
| 9 | 243 | 113 | 53 | 108 | 1 | 39 | 0 | 894 | 7 | 4 | 35 | 28 | 39 |
| 10 | 119 | 3 | 71 | 0 | 1 | 3 | 528 | 66 | 7 | 6 | 110 | 70 | 122 |
| 11 | 7 | 4 | 0 | 3 | 0 | 2 | 4 | 122 | 4 | 5 | 4 | 3 | 1 |
| 12 | 246 | 12 | 16 | 8 | 0 | 0 | 89 | 3 | 205 | 0 | 0 | 36 | 67 |
| 13 | 6 | 41 | 0 | 50 | 5 | 23 | 0 | 0 | 0 | 43 | 124 | 0 | 1 |
| 14 | 0 | 37 | 6 | 0 | 0 | 103 | 0 | 9 | 3 | 0 | 2 | 0 | 0 |
| 15 | 0 | 0 | 1 | 4 | 8 | 0 | 1 | 6 | 1 | 1 | 0 | 0 | 2 |
| 16 | 0 | 108 | 0 | 0 | 32 | 2 | 0 | 15 | 0 | 1 | 8 | 0 | 0 |
| 17 | 6 | 1 | 0 | 0 | 0 | 0 | 0 | 2 | 3 | 0 | 1 | 0 | 0 |
| 18 | 0 | 4 | 4 | 0 | 0 | 0 | 0 | 0 | 1 | 0 | 0 | 96 | 2524 |
| 19 | 0 | 11 | 209 | 109 | 0 | 3 | 0 | 1 | 0 | 1003 | 0 | 0 | 1 |
| 20 | 0 | 1 | 426 | 125 | 30 | 157 | 3 | 344 | 183 | 195 | 11 | 182 | 312 |
| 21 | 53 | 3122 | 1333 | 70 | 2582 | 3393 | 792 | 727 | 268 | 11691 | 25 | 124 | 1277 |
| 22 | 269 | 2601 | 979 | 1219 | 14799 | 966 | 1698 | 28383 | 8105 | 9836 | 7759 | 7567 | 354 |
| 23 | 388 | 1643 | 10264 | 5991 | 12246 | 6749 | 760 | 10472 | 10140 | 7088 | 6995 | 5958 | 10527 |

Table S2 Number of forest pixels that underwent linear interpolation within the 2001-2013 MODIS derived NDII7 time series. Complete forest mask comprises 52394 pixels.

| compo-site | **year** | | | | | | | | | | | | |
| --- | --- | --- | --- | --- | --- | --- | --- | --- | --- | --- | --- | --- | --- |
| 2001 | 2002 | 2003 | 2004 | 2005 | 2006 | 2007 | 2008 | 2009 | 2010 | 2011 | 2012 | 2013 |
| 1 | 864 | 7382 | 1362 | 149 | 1581 | 493 | 3717 | 2964 | 529 | 149 | 756 | 522 | 1188 |
| 2 | 422 | 6435 | 1444 | 300 | 1305 | 512 | 498 | 1099 | 79 | 289 | 1577 | 504 | 101 |
| 3 | 837 | 4266 | 1173 | 985 | 1307 | 586 | 1307 | 1801 | 155 | 157 | 2223 | 471 | 123 |
| 4 | 863 | 1673 | 2417 | 562 | 1548 | 250 | 1654 | 2953 | 299 | 363 | 1141 | 2241 | 305 |
| 5 | 775 | 5200 | 4947 | 1323 | 4212 | 668 | 3366 | 2448 | 1172 | 990 | 1796 | 3630 | 903 |
| 6 | 528 | 4849 | 5101 | 1509 | 6241 | 2272 | 861 | 2471 | 1476 | 1146 | 1231 | 3042 | 276 |
| 7 | 1124 | 955 | 3200 | 1458 | 2373 | 1045 | 2042 | 7426 | 347 | 1488 | 1633 | 796 | 436 |
| 8 | 283 | 1383 | 2819 | 2130 | 2175 | 1953 | 1845 | 1111 | 214 | 1362 | 596 | 718 | 654 |
| 9 | 351 | 2305 | 1158 | 1001 | 634 | 1848 | 176 | 2316 | 162 | 669 | 490 | 572 | 1740 |
| 10 | 353 | 780 | 368 | 920 | 371 | 467 | 1886 | 888 | 109 | 184 | 560 | 509 | 975 |
| 11 | 90 | 97 | 92 | 215 | 59 | 193 | 99 | 462 | 55 | 43 | 339 | 81 | 79 |
| 12 | 451 | 86 | 94 | 151 | 61 | 26 | 739 | 56 | 878 | 35 | 22 | 45 | 209 |
| 13 | 28 | 168 | 24 | 304 | 19 | 19 | 14 | 5 | 10 | 162 | 545 | 30 | 13 |
| 14 | 8 | 109 | 57 | 8 | 3 | 645 | 32 | 27 | 24 | 44 | 41 | 44 | 1 |
| 15 | 21 | 22 | 91 | 31 | 181 | 433 | 34 | 64 | 72 | 18 | 11 | 8 | 28 |
| 16 | 48 | 430 | 77 | 18 | 256 | 10 | 17 | 24 | 2 | 16 | 44 | 5 | 8 |
| 17 | 181 | 28 | 45 | 26 | 13 | 88 | 33 | 41 | 66 | 33 | 24 | 14 | 10 |
| 18 | 419 | 118 | 219 | 80 | 271 | 164 | 345 | 72 | 51 | 186 | 60 | 333 | 757 |
| 19 | 990 | 1639 | 464 | 774 | 1075 | 538 | 506 | 441 | 346 | 67 | 193 | 339 | 131 |
| 20 | 2839 | 2681 | 578 | 1644 | 1809 | 3336 | 1936 | 989 | 517 | 503 | 2041 | 478 | 546 |
| 21 | 3807 | 2111 | 1582 | 3601 | 2840 | 4399 | 1924 | 748 | 2344 | 364 | 3719 | 1201 | 957 |
| 22 | 5162 | 1876 | 2903 | 2158 | 279 | 1453 | 2684 | 15 | 372 | 530 | 1037 | 618 | 2193 |
| 23 | 6462 | 2478 | 1880 | 2033 | 562 | 3712 | 4448 | 425 | 620 | 708 | 899 | 352 | 573 |

© 2018 by the authors. Licensee MDPI, Basel, Switzerland. This article is an open access article distributed under the terms and conditions of the Creative Commons Attribution (CC BY) license (http://creativecommons.org/licenses/by/4.0/).
